# Supplementary material for: Structural evolution of (Au2S)n (n = 1–8) clusters from first principles global optimization
Source: Royal Society of Chemistry journal article supplement (doi:10.1039/c5ra06137g), 2015-01-01
Supplement: c5ra06137g1.pdf [file c5ra06137g1.pdf]

## Supplementary Information

### **Structural evolution of $(\text{Au}_2\text{S})_n$ ( $n = 1-8$ ) clusters from first principles global optimization**

By

Yiqun Feng and Longjiu Cheng\*

Department of Chemistry, Anhui University, Hefei, Anhui, 230039, People's Republic of China.

\*Corresponding authors. E-mail: [clj@ustc.edu](mailto:clj@ustc.edu) (L.C.)

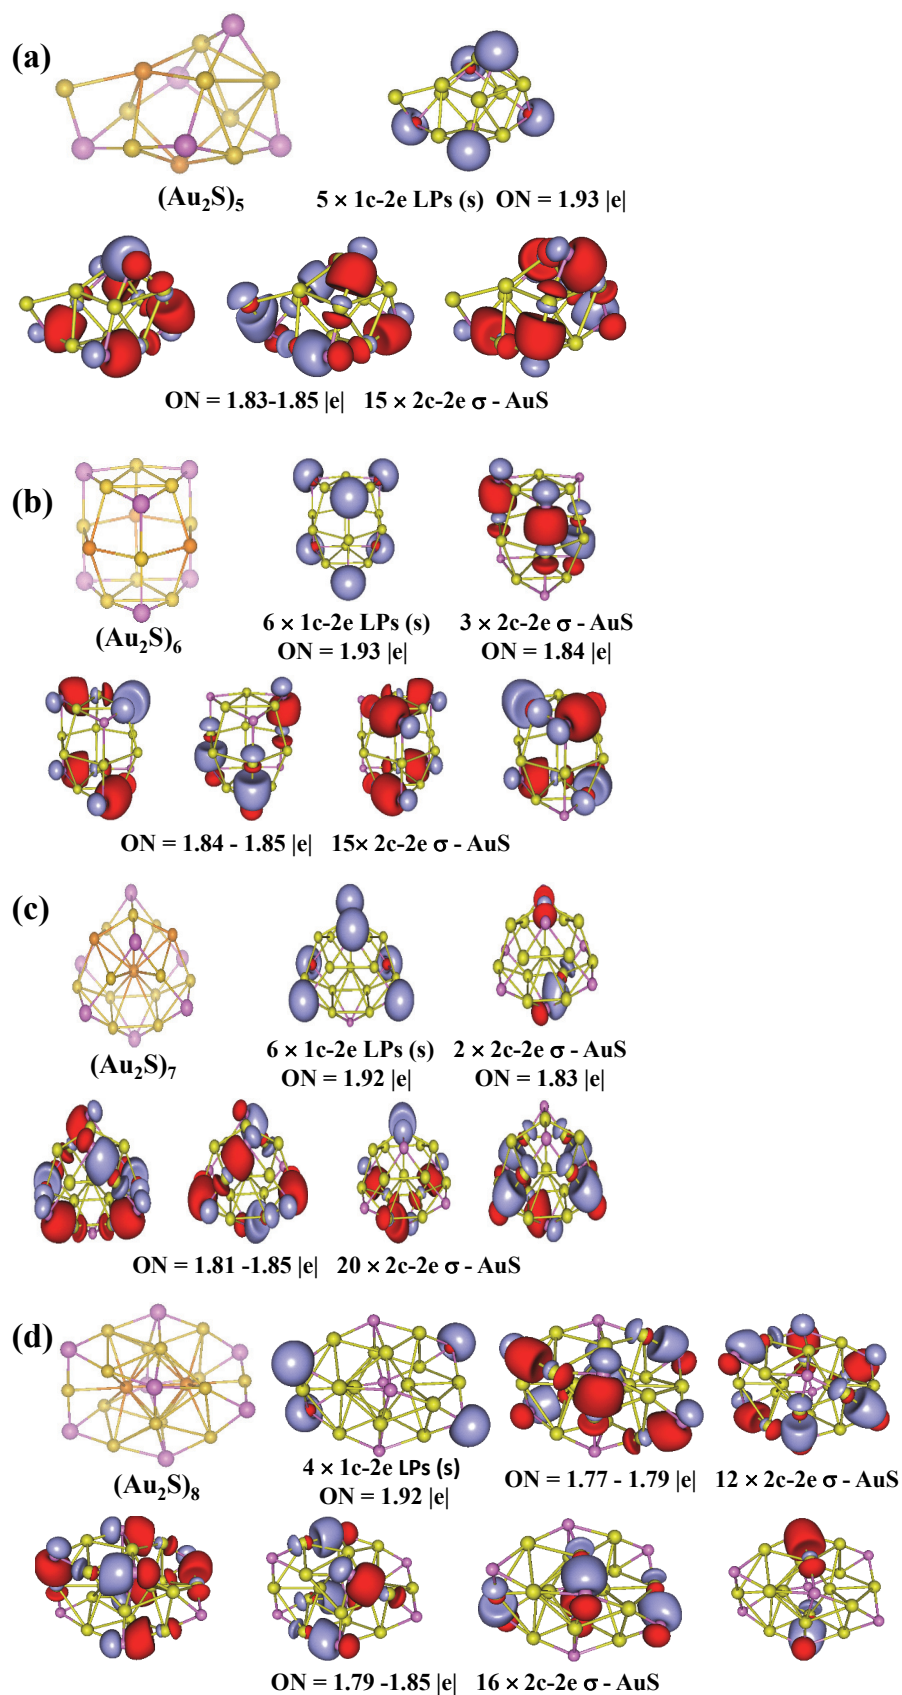

**Figure S1.** AdNDP localized chemical bonding orbitals of the global minimum structures of  $(\text{Au}_2\text{S})_n$  ( $n = 5\text{-}8$ ) at TPSS/Lan12DZ/6-31G\* level of theory. ON gives the occupancy numbers.

The atomic coordinates (in Å) of the global minimum structures of  $(\text{Au}_2\text{S})_n$  ( $n = 1-8$ ) clusters.

|     |     |           |           |           |
|-----|-----|-----------|-----------|-----------|
| 1A: | Au  | 0.000000  | 1.620713  | -0.147210 |
|     | Au  | 0.000000  | -1.620713 | -0.147210 |
|     | S   | 0.000000  | 0.000000  | 1.453700  |
| 2A: | Au  | -0.171453 | 1.349461  | -0.154460 |
|     | Au  | 0.171453  | -1.349461 | -0.154460 |
|     | Au  | -2.496302 | -0.823644 | 0.206879  |
|     | Au  | 2.496302  | 0.823644  | 0.206879  |
|     | S   | -2.496302 | 1.437622  | -0.258821 |
|     | S   | 2.496302  | -1.437622 | -0.258821 |
| 3A: | Au  | 0.359687  | -0.858867 | 1.508377  |
|     | Au  | 0.359687  | -0.858867 | -1.508377 |
|     | Au  | -1.938135 | 1.232629  | 2.294601  |
|     | Au  | 2.641667  | -2.510111 | 0.000000  |
|     | Au  | 0.299097  | 1.754181  | 0.000000  |
|     | Au  | -1.938135 | 1.232629  | -2.294601 |
|     | S   | 0.347777  | -2.753979 | 0.000000  |
|     | S   | 0.359687  | 1.397741  | 2.388983  |
|     | S   | 0.359687  | 1.397741  | -2.388983 |
| 4A: | Au  | 1.552327  | 1.832801  | 0.601278  |
|     | Au  | -1.552327 | 1.832801  | 0.601278  |
|     | Au  | 0.000000  | 2.322672  | -2.305451 |
|     | Au  | 0.000000  | 0.000000  | 2.391517  |
|     | Au  | -1.552327 | -1.832801 | 0.601278  |
|     | Au  | 0.000000  | 0.000000  | -0.833112 |
|     | Au  | 1.552327  | -1.832801 | 0.601278  |
|     | Au  | 0.000000  | -2.322672 | -2.305451 |
|     | S   | 0.000000  | 3.504745  | -0.302467 |
|     | S   | -2.432609 | 0.000000  | 1.900698  |
|     | S   | 2.432609  | 0.000000  | 1.900698  |
|     | S   | 0.000000  | -3.504745 | -0.302467 |
|     | 5A: | Au        | 1.401126  | -0.056963 |
| Au  |     | 1.659414  | 2.364174  | 0.000000  |
| Au  |     | -0.973570 | 2.103308  | 1.541170  |
| Au  |     | 0.208921  | 0.036736  | 0.000000  |
| Au  |     | 1.512223  | -2.447920 | 0.000000  |
| Au  |     | -2.733154 | -0.496410 | 0.000000  |
| Au  |     | -0.980435 | -1.941926 | 1.579001  |

|     |    |           |           |           |
|-----|----|-----------|-----------|-----------|
|     | Au | 1.401126  | -0.056963 | -2.518421 |
|     | Au | -0.973570 | 2.103308  | -1.541170 |
|     | Au | -0.980435 | -1.941926 | -1.579001 |
|     | S  | 1.268129  | -2.453449 | 2.407473  |
|     | S  | 1.281303  | 2.331786  | 2.412889  |
|     | S  | -2.835738 | 1.895326  | 0.000000  |
|     | S  | 1.268129  | -2.453449 | -2.407473 |
|     | S  | 1.281303  | 2.331786  | -2.412889 |
| 6A: | Au | 0.000000  | 2.430405  | 1.206868  |
|     | Au | -2.492494 | -1.485702 | 0.656439  |
|     | Au | -2.492494 | 1.485702  | 0.656439  |
|     | Au | 0.000000  | 0.000000  | 2.627257  |
|     | Au | -2.347393 | 0.000000  | -1.955182 |
|     | Au | 0.000000  | -2.430405 | 1.206868  |
|     | Au | 2.492494  | -1.485702 | 0.656439  |
|     | Au | 0.000000  | -2.478209 | -1.608549 |
|     | Au | 2.492494  | 1.485702  | 0.656439  |
|     | Au | 0.000000  | 2.478209  | -1.608549 |
|     | Au | 0.000000  | 0.000000  | -0.295504 |
|     | Au | 2.347393  | 0.000000  | -1.955182 |
|     | S  | -2.420479 | 0.000000  | 2.598939  |
|     | S  | -2.402520 | 2.409511  | -1.600391 |
|     | S  | -2.402520 | -2.409511 | -1.600391 |
|     | S  | 2.420479  | 0.000000  | 2.598939  |
|     | S  | 2.402520  | -2.409511 | -1.600391 |
|     | S  | 2.402520  | 2.409511  | -1.600391 |
| 7A: | Au | 0.000000  | 3.602576  | -0.690586 |
|     | Au | 0.000000  | 0.000000  | -0.026023 |
|     | Au | 1.480864  | -1.438932 | -2.140399 |
|     | Au | 2.433846  | 1.585597  | 0.951607  |
|     | Au | 1.480864  | 1.438932  | -2.140399 |
|     | Au | -2.433846 | 1.585597  | 0.951607  |
|     | Au | -1.480864 | 1.438932  | -2.140399 |
|     | Au | -1.480864 | -1.438932 | -2.140399 |
|     | Au | 0.000000  | 2.491896  | 1.764068  |
|     | Au | 2.433846  | -1.585597 | 0.951607  |
|     | Au | 0.000000  | -2.491896 | 1.764068  |
|     | Au | 0.000000  | -3.602576 | -0.690586 |
|     | Au | -2.433846 | -1.585597 | 0.951607  |
|     | Au | 0.000000  | 0.000000  | 2.886890  |
|     | S  | -2.407675 | 3.226731  | -0.805230 |
|     | S  | 0.000000  | 0.000000  | -3.572480 |

|     |    |           |           |           |
|-----|----|-----------|-----------|-----------|
|     | S  | 2.407675  | 3.226731  | -0.805230 |
|     | S  | 2.417206  | 0.000000  | 2.772941  |
|     | S  | 2.407675  | -3.226731 | -0.805230 |
|     | S  | -2.407675 | -3.226731 | -0.805230 |
|     | S  | -2.417206 | 0.000000  | 2.772941  |
| 8A: | Au | 0.000000  | 0.000000  | 4.234242  |
|     | Au | -1.225237 | 2.419393  | 2.414415  |
|     | Au | 0.000000  | 0.000000  | 1.443225  |
|     | Au | 1.792796  | 2.088981  | 2.189262  |
|     | Au | -2.516618 | 0.000000  | 0.218089  |
|     | Au | 0.000000  | 2.516618  | -0.218089 |
|     | Au | -1.792796 | -2.088981 | 2.189262  |
|     | Au | 1.225237  | -2.419393 | 2.414415  |
|     | Au | -2.088981 | 1.792796  | -2.189262 |
|     | Au | -2.419393 | -1.225237 | -2.414415 |
|     | Au | 2.516618  | 0.000000  | 0.218089  |
|     | Au | 2.088981  | -1.792796 | -2.189262 |
|     | Au | 0.000000  | 0.000000  | -1.443225 |
|     | Au | 0.000000  | -2.516618 | -0.218089 |
|     | Au | 2.419393  | 1.225237  | -2.414415 |
|     | Au | 0.000000  | 0.000000  | -4.234242 |
|     | S  | 0.433829  | 2.346822  | 4.169612  |
|     | S  | -2.485084 | 2.457617  | 0.268913  |
|     | S  | -0.433829 | -2.346822 | 4.169612  |
|     | S  | -2.457617 | -2.485084 | -0.268913 |
|     | S  | 2.485084  | -2.457617 | 0.268913  |
|     | S  | 2.457617  | 2.485084  | -0.268913 |
|     | S  | -2.346822 | 0.433829  | -4.169612 |
|     | S  | 2.346822  | -0.433829 | -4.169612 |
